# Supplementary material
Source: HighWire-hosted journal article supplement (https://erj.ersjournals.com/content/58/4/2100986)
Supplement: inline-supplementary-material-1 [file inline-supplementary-material-1.pdf]

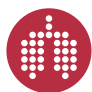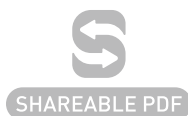

# Understanding the impact of the lung microenvironment to enhance the therapeutic potential of mesenchymal stromal cells for acute respiratory distress syndrome

Claire Masterson<sup>1,2</sup>, Hector Gonzalez<sup>1,2</sup> and John G. Laffey <sup>1,2,3</sup>

<sup>1</sup>Anaesthesia, School of Medicine, National University of Ireland, Galway, Ireland. <sup>2</sup>Regenerative Medicine Institute, National University of Ireland, Galway, Ireland. <sup>3</sup>Dept of Anaesthesia and Intensive Care Medicine, Galway University Hospitals, Saolta University Hospital Group, Galway, Ireland.

Corresponding author: John G. Laffey ([john.laffey@nuigalway.ie](mailto:john.laffey@nuigalway.ie))

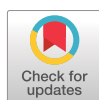

Shareable abstract (@ERSpublications)

**An enhanced understanding of the impact of the lung microenvironment on exogenously administered mesenchymal stromal cells has the potential to enhance their therapeutic potential for ARDS** <https://bit.ly/2S2fQ1l>

**Cite this article as:** Masterson C, Gonzalez H, Laffey JG. Understanding the impact of the lung microenvironment to enhance the therapeutic potential of mesenchymal stromal cells for acute respiratory distress syndrome. *Eur Respir J* 2021; 58: 2100986 [DOI: 10.1183/13993003.00986-2021].

This single-page version can be shared freely online.

Copyright ©The authors 2021.  
For reproduction rights and  
permissions contact  
[permissions@ersnet.org](mailto:permissions@ersnet.org)

Received: 3 April 2021  
Accepted: 24 April 2021

Acute respiratory distress syndrome (ARDS) is a clinical syndrome of severe acute hypoxaemic respiratory failure with clinical features including reduced lung compliance and permeability-induced pulmonary oedema, which can frequently progress to multiple organ failure [1, 2]. ARDS occurs in 10% of all critically patients in ICU and nearly one quarter of all mechanically ventilated patients [3]. Common underlying causes of ARDS include bacterial or viral pneumonia, sepsis, pulmonary aspiration and trauma [4]. The burden of ARDS is substantial, with hospital mortality rates varying, depending on ARDS severity, from 30–45% of affected patients [5]. Of further concern, ARDS survivors are often left with debilitating long-term sequelae which reduces their quality of life.
